# Supplementary material for: Interfacial growth of 2D MOF membranes via contra-diffusion for CO2 separation
Source: Royal Society of Chemistry journal article supplement (doi:10.1039/d1qm00154j), 2021-01-01
Supplement: d1qm00154j1.pdf [file d1qm00154j1.pdf]

## *Supporting Information*

### **Interfacial growth of 2D MOF membranes *via* contra- diffusion for CO<sub>2</sub> separation**

Shuangshuang Jiang,<sup>a</sup> Xinli Shi,<sup>a</sup> Yucong Zu,<sup>a</sup> Fuxing Sun,<sup>\*a</sup> Guangshan Zhu<sup>\*b</sup>

<sup>a</sup>*State Key Laboratory of Inorganic Synthesis and Preparative Chemistry, Jilin University, Changchun, 130012, PR China. E-mail: fxsun@jlu.edu.cn*

<sup>b</sup>*Key Laboratory of Polyoxometalate Science of the Ministry of Education, Faculty of Chemistry, Northeast Normal University, Changchun, 130024, PR China. E-mail: zhugs@jlu.edu.cn*

Table of Contents:

1. Supporting Tables and Figures
2. Supporting References

## 1. Supporting Tables and Figures

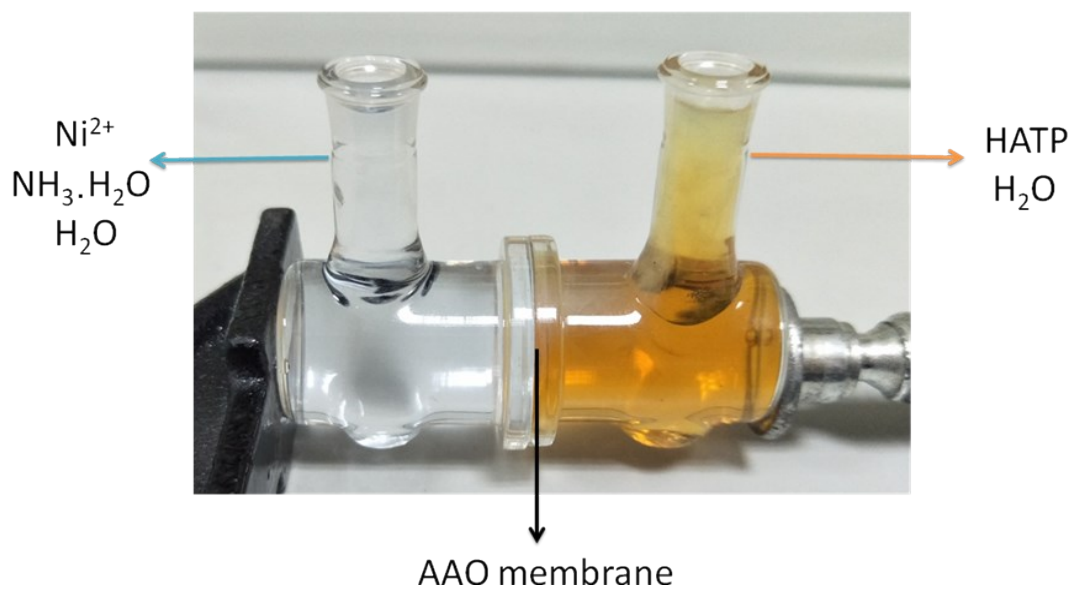

Fig. S1 Digital photograph of the home-made contra-diffusion cell.

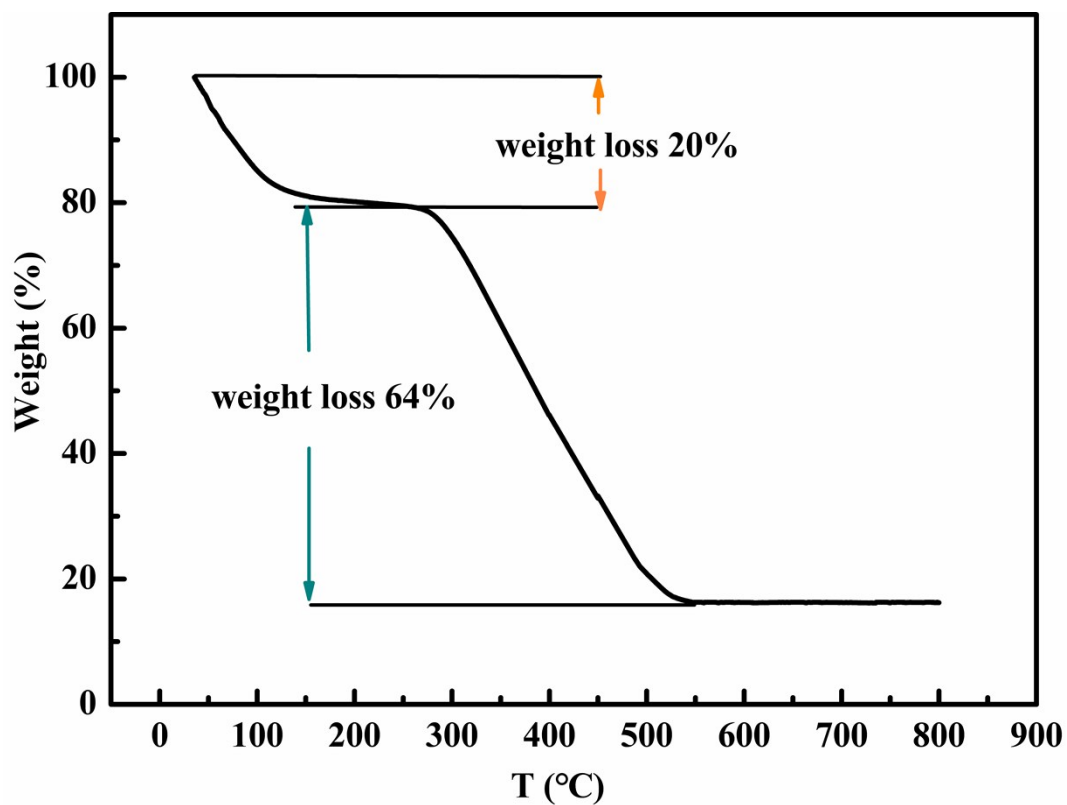

Fig. S2 The TGA curve of peeled  $\text{Ni}_3(\text{HITP})_2$  powder.

**Table S1** Textural pore properties data for the peeled MOF powder and reported by literatures

| Sample                              | $S_{\text{BET}}$ ( $\text{m}^2 \text{g}^{-1}$ ) | $V_{\text{total}}$ ( $\text{cm}^3 \text{g}^{-1}$ ) | Pore size (nm) | Ref       |
|-------------------------------------|-------------------------------------------------|----------------------------------------------------|----------------|-----------|
| $\text{Ni}_3(\text{HITP})_2$        | $884.7 \pm 0.9$                                 | /                                                  | 1.3, 1.6       | 1         |
| $\text{Ni}_3(\text{HITP})_2$        | 530                                             | 0.53                                               | 1.4, 1.7-2     | 2         |
| $\text{Ni}_3(\text{HITP})_2$        | 628.23                                          | 0.512                                              | 0.8, 2.1       | 3         |
| $\text{Ni}_3(\text{HITP})_2$        | 458                                             | /                                                  | /              | 4         |
| $\text{Ni}_3(\text{HITP})_2$        | 421/340                                         | /                                                  | /              | 5         |
| Peeled $\text{Ni}_3(\text{HITP})_2$ | 638.8                                           | /                                                  | 1.5            | 6         |
| Peeled $\text{Ni}_3(\text{HITP})_2$ | 900.7                                           | 1.6                                                | 1.4-2, 4.5-7.5 | This work |

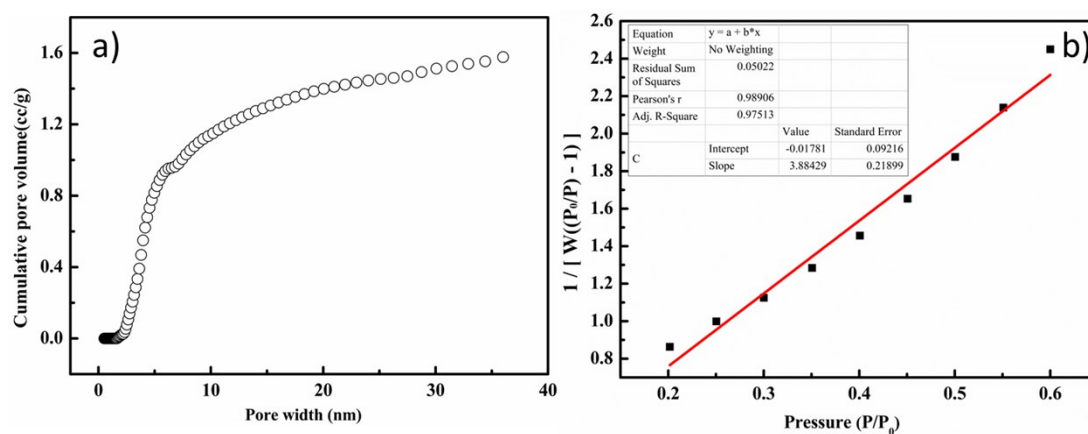**Fig. S3** a) The total pore volume and b) BET plot of  $\text{Ni}_3(\text{HITP})_2$  powder peeled of the membranes

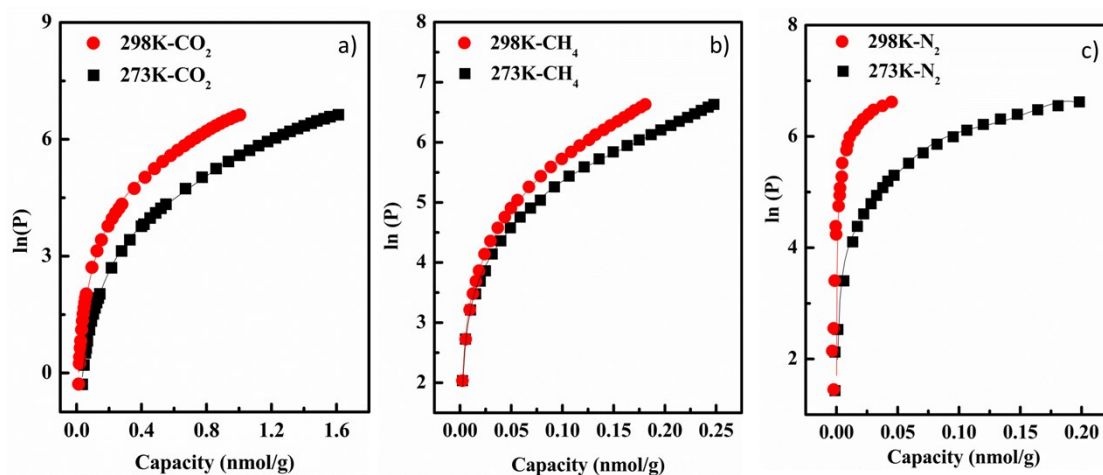

Fig. S4  $\text{CO}_2$ ,  $\text{N}_2$  and  $\text{CH}_4$  adsorption isotherms for  $\text{Ni}_3(\text{HITP})_2$  powder peeled of the membranes at 273 K, 298 K fitted by the dual-site Langmuir-Freundlich equation.

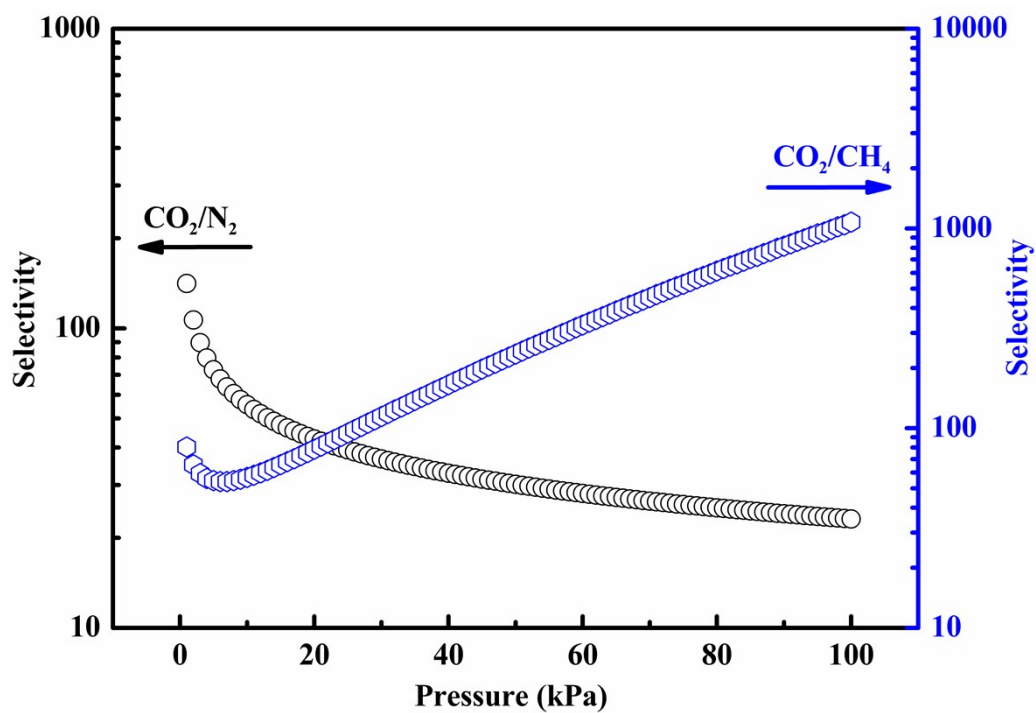

Fig. S5 The IAST selectivity of peeled  $\text{Ni}_3(\text{HITP})_2$  powder at 273 K.

**Table S2** Comparison between the MOF membranes reported by literatures and this work.  
Permeance given in units of ( $10^{-8}$  mol m<sup>2</sup> s<sup>-1</sup> Pa<sup>-1</sup>)

| Membrane                                    | CO <sub>2</sub><br>Permeability | CO <sub>2</sub> /N <sub>2</sub><br>Ideal<br>Selectivity | CO <sub>2</sub> /CH <sub>4</sub><br>Ideal<br>Selectivity | Ref.         |
|---------------------------------------------|---------------------------------|---------------------------------------------------------|----------------------------------------------------------|--------------|
| Bio-MOF-1                                   | 110                             | /                                                       | 2.6                                                      | 7            |
| ZIF-67                                      | 27.8                            | 2.9                                                     | 5.4                                                      | 8            |
| ZIF-69                                      | 2.36                            | 2.2                                                     | 2.7                                                      | 9            |
| ZIF-8                                       | 114                             | 2.1                                                     | 2.2                                                      | 10           |
| Bio-MOF-14                                  | 416                             | /                                                       | 3.5                                                      | 11           |
| [Cu <sub>2</sub> L <sub>2</sub> P]          | 1.5                             | /                                                       | 4~5                                                      | 12           |
| HKUST-1                                     | 28.1                            | 1.0                                                     | 1.7                                                      | 13           |
| Cu(bipy) <sub>2</sub> (SiF <sub>6</sub> )   | 3.85                            | 0.9                                                     | 0.9                                                      | 14           |
| CAU-1                                       | 1.46                            | 0.7                                                     | 0.8                                                      | 15           |
| JUC-150                                     | 1                               | 0.6                                                     | 0.9                                                      | 16           |
| Zn <sub>2</sub> BzIm <sub>3</sub>           | 0.81                            | 0.8                                                     | 1.0                                                      | 17           |
| ZIF-90                                      | 47.5                            | 7.1                                                     | 5.9                                                      | 18           |
| ZIF-7                                       | 900                             | 13.6                                                    | 13.5                                                     | 19           |
| sod-ZMOF-1                                  | 910                             | 8.6                                                     | 3.7                                                      | 20           |
| ZIF-8                                       | 3.5                             | 7.0                                                     | 7.1                                                      | 21           |
| Co-MOF-74                                   | 22.5                            | 0.9                                                     | 0.6                                                      | 22           |
| NH <sub>2</sub> -MIL-53                     | 0.18                            | 0.9                                                     | 0.9                                                      | 23           |
| [Zn <sub>2</sub> (cam) <sub>2</sub> dabco]  | 0.00733                         | 0.5                                                     | 0.5                                                      | 24           |
| ZIF-7-8                                     | 1.5                             | 20                                                      | 23.84                                                    | 25           |
| Cu(dhbc) <sub>2</sub> (bpy)                 | 3.83                            | 22.8                                                    | 19.6                                                     | 26           |
| ZIF-8                                       | 15                              | 6.3                                                     | 4.2                                                      | 27           |
| SIFSIX-3-Ni                                 | 45                              | /                                                       | 9.9                                                      | 28           |
| [Ni <sub>2</sub> (Lasp) <sub>2</sub> (bpe)] | 17.8                            | 1.4                                                     | 2.2                                                      | 29           |
| Fe-soc-MOF-1b                               | 0.97                            | 0.7                                                     | 1.8                                                      | 30           |
| Cu-BTC/MIL-100                              | 0.113                           | 2.8                                                     | 4.3                                                      | 31           |
| NH <sub>2</sub> -MIL-125(Ti)                | 0.2                             | 0.5                                                     | 0.5                                                      | 32           |
| MIL-100(In)                                 | 90                              | 3.8                                                     | 1.1                                                      | 33           |
| ZIF-100                                     | 0.081                           | 0.3                                                     | 0.6                                                      | 34           |
| ZIF-8                                       | 4.45                            | 3                                                       | 3.3                                                      | 35           |
| CAU-10-H                                    | 400                             | /                                                       | 4                                                        | 36           |
| COF-300-ZIF-8                               | 2.67                            | /                                                       | 0.5                                                      | 37           |
| ZIF-8                                       | 15.3                            | 4.9                                                     | 3.4                                                      | 38           |
| LDH-ZIF-8                                   | 0.187                           | 3.1                                                     | 10.3                                                     | 39           |
| ZIF-8/GO                                    | 35.8                            | 3.1                                                     | 3.2                                                      | 40           |
| ZIF-67                                      | 0.108                           | 2.8                                                     | 2.9                                                      | 41           |
| ZIF-8                                       | 652                             | 4.3                                                     | 5.4                                                      | 42           |
| Ni <sub>3</sub> (HITP) <sub>2</sub>         | 226                             | 11.9                                                    | /                                                        | 2            |
| Ni-MOF                                      | 143                             | 9.8                                                     | 6.8                                                      | This<br>work |

## 2. Supporting References

1. Chen, T.; Dou, J.-H.; Yang, L.; Sun, C.; Libretto, N. J.; Skorupskii, G.; Miller, J. T.; Dincă, M. Continuous Electrical Conductivity Variation in  $M_3(\text{hexaiminotriphenylene})_2$  ( $M = \text{Co, Ni, Cu}$ ) MOF Alloys. *J. Am. Chem. Soc.*, 2020, **142**, 12367-12373.
2. S. S. Jiang, X. L. Shi, F. X. Sun, G. S. Zhu, Fabrication of Crystalline Microporous Membrane from 2D MOF Nanosheets for Gas Separation, *Chem Asian J.*, 2020, **15**, 2371-2378.
3. D. Cai, M. Lu, L. Li, J. Cao, D. Chen, H. Tu, J. Li and W. Han, A Highly Conductive MOF of Graphene Analogue  $\text{Ni}_3(\text{HITP})_2$  as a Sulfur Host for High - Performance Lithium-Sulfur Batteries, *Small*, 2019, **15**, 1902605.
4. A. Nazir, H. T. T. Le, C. W. Min, A. Kasbe, J. Kim, C. S. Jin and C. J. Park, Coupling of a conductive  $\text{Ni}_3(2,3,6,7,10,11\text{-hexaiminotriphenylene})_2$  metal-organic framework with silicon nanoparticles for use in high-capacity lithium-ion batteries, *Nanoscale*, 2020, **12**, 1629-1642.
5. M. K. Smith and K. A. Mirica, Self-Organized Frameworks on Textiles (SOFT): Conductive Fabrics for Simultaneous Sensing, Capture, and Filtration of Gases, *J. Am. Chem. Soc.*, 2017, **139**, 16759-16767.
6. Y. Zang, F. Pei, J. H. Huang, Z. H. Fu, G. Xu and X. L. Fang, Large-Area Preparation of Crack-Free Crystalline Microporous Conductive Membrane to Upgrade High Energy Lithium-Sulfur Batteries, *Adv. Energy Mater.*, 2018, **8**, 1802052.
7. J. A. Bohrman, M. A. Carreon, Synthesis and  $\text{CO}_2/\text{CH}_4$  separation performance of Bio-MOF-1 membranes, *Chem. Commun.*, 2012, **48**, 5130-5132.
8. P. Nian, Y. Li, X. Zhang, Y. Cao, H. Liu, X. Zhang, Zno Nanorod-induced Heteroepitaxial Growth of SOD Type Co-based Zeolitic Imidazolate Framework Membranes for  $\text{H}_2$  Separation. *ACS Applied Materials & Interfaces*, 2018, **10** (4), 4151–4160.
9. Y. Y. Liu, G. F. Zeng, Y. C. Pan, et al, Synthesis of highly c-oriented ZIF-69 membranes by secondary growth and their gas permeation properties, *J. Membr. Sci.*, 2011, **379**, 46-51.
10. G. W. He, M. Dakhchoune, J. Zhao, Huang, S. Q. K. V. Agrawal, Electrophoretic Nuclei Assembly for Crystallization of High-performance Membranes on Unmodified Supports. *Adv. Funct. Mater.*, 2018, **28** (20), 1707427.
11. Z. Z. Xie, T. Li, N. L. Rosi, et al, Alumina-supported cobalt-adeninate MOF membranes for  $\text{CO}_2/\text{CH}_4$  separation, *J. Mater. Chem. A.*, 2014, **2**, 1239-1242.
12. A. Betard, H. Bux, S. Henke, et al, Fabrication of a  $\text{CO}_2$ -selective membrane by stepwise liquid-phase deposition of an alkylether functionalized pillared-layered metal-organic framework  $[\text{Cu}_2\text{L}_2\text{P}]_n$  on a macroporous support, *Microporous Mesoporous Mater.*, 2012, **150**, 76-82.

13. H. Guo, G. Zhu, I. J. Hewitt, S. Qiu, “Twin Copper Source” Growth of Metal-Organic Framework Membrane:  $\text{Cu}_3(\text{BTC})_2$  with High Permeability and Selectivity for Recycling  $\text{H}_2$ , *J. Am. Chem. Soc.*, 2009, **131**, 1646.
14. S. Fan, F. Sun, J. Xie, J. Guo, L. Zhang, C. Wang, Q. Pan, G. Zhu, Facile synthesis of a continuous thin  $\text{Cu}(\text{bipy})_2(\text{SiF}_6)$  membrane with selectivity towards hydrogen, *J. Mater. Chem. A.*, 2013, **1**, 11438.
15. S. Zhou, X. Zou, F. Sun, H. Ren, J. Liu, F. Zhang, N. Zhao, G. Zhu, Development of hydrogen-selective CAU-1 MOF membranes for hydrogen purification by ‘dual-metal-source’ approach, *Int. J. Hydrogen Energy*, 2013, **38**, 5338.
16. Z. Kang, M. Xue, L. Fan, L. Huang, L. Guo, G. Wei, B. Chen, S. Qiu, Highly selective sieving of small gas molecules by using an ultra-microporous metal–organic framework membrane, *Energy Environ. Sci.*, 2014, **7**, 4053.
17. Y. Peng, Y. Li, Y. Ban, W. Yang, Two-Dimensional Metal-Organic Framework Nanosheets for Membrane-Based Gas Separation, *Angew. Chemie Int. Ed.*, 2017, **56**, 9757.
18. K. Eum, C. Ma, D.-Y. Koh, F. Rashidi, Z. Li, C. W. Jones, R. P. Lively, S. Nair, Zeolitic Imidazolate Framework Membranes Supported on Macroporous Carbon Hollow Fibers by Fluidic Processing Techniques, *Adv. Mater. Interfaces*, 2017, **4**, 1700080.
19. F. Cacho-Bailo, S. Catalán-Aguirre, M. Etxebarria-Benavides, O. Karvan, V. Sebastian, C. Téllez, J. Coronas, Metal-organic framework membranes on the inner-side of a polymeric hollow fiber by microfluidic synthesis, *J. Memb. Sci.* 2015, **476**, 277.
20. B. A. Al-Maythaly, O. Shekhah, R. Swaidan, Y. Belmabkhout, I. Pinnau, M. Eddaoudi, Quest for Anionic MOF Membranes: Continuous sod-ZMOF Membrane with  $\text{CO}_2$  Adsorption-Driven Selectivity, *J. Am. Chem. Soc.* 2015, **137**, 1754.
21. Y. Hu, J. Wei, Y. Liang, H. Zhang, X. Zhang, W. Shen, H. Wang, Zeolitic Imidazolate Framework/Graphene Oxide Hybrid Nanosheets as Seeds for the Growth of Ultrathin Molecular Sieving Membranes, *Angew. Chemie Int. Ed.*, 2016, **128**, 2088.
22. X. Qin, Y. Sun, N. Wang, Q. Wei, L. Xie, Y. Xie, J.-R. Li, Nanostructure array assisted aggregation-based growth of a Co-MOF-74 membrane on a Ni-foam substrate for gas separation, *RSC Adv.*, 2016, **6**, 94177.
23. W. Li, P. Su, G. Zhang, C. Shen, Q. Meng, Preparation of continuous  $\text{NH}_2$ -MIL-53 membrane on ammoniated polyvinylidene fluoride hollow fiber for efficient  $\text{H}_2$  purification, *J. Memb. Sci.*, 2015, **495**, 384.
24. K. Huang, S. Liu, Q. Li, W. Jin, Sep. Preparation of novel metal-carboxylate system MOF membrane for gas separation, *Purif. Technol.*, 2013, **119**, 94.

25. Q. Hou, Y. Wu, S. Zhou, Y. Wei, J. Caro, H. Wang, Ultra-Tuning of the Aperture Size in Stiffened ZIF-8<sub>Cm</sub> Frameworks with Mixed-Linker Strategy for Enhanced CO<sub>2</sub>/CH<sub>4</sub> Separation, *Angew. Chemie Int. Ed.*, 2019, **58**, 327.
26. Y. Ying, Z. Zhang, S. B. Peh, A. Karmakar, Y. Cheng, J. Zhang, L. Xi, C. Boothroyd, Y. M. Lam, C. Zhong and D. Zhao, Pressure-Responsive Two-Dimensional Metal-Organic Framework Composite Membranes for CO<sub>2</sub> Separation, *Angewandte Chemie*, 2021, **60**, 2-10.
27. Y. Miao, D. Lee, M. Dorneles De Mello, M. Abdel-Rahman, P. Corkery, J. A. Boscoboinik, H. Fairbrother and M. Tsapatsis, Electron beam induced modification of ZIF-8 membrane permeation properties, *Chem. Comm.*, 2021. DOI: 10.1039/D1CC00252J.
28. V. Chernikova, O. Shekhah, Y. Belmabkhout and M. Eddaoudi, Nanoporous Fluorinated Metal-Organic Framework-Based Membranes for CO<sub>2</sub> Capture, *ACS Applied Nano Materials*, 2020, **3**, 6432-6439.
29. Z. Kang, L. Fan, S. Wang, D. Sun, M. Xue, S. Qiu, In situ confinement of free linkers within a stable MOF membrane for highly improved gas separation properties, *CrystEngComm.*, 2017, **19**, 1601.
30. Y. Belmabkhout, R. S. Pillai, D. Alezi, O. Shekhah, P. M. Bhatt, Z. Chen, K. Adil, S. Vaesen, G. De Weireld, M. Pang, M. Suetin, A. J. Cairns, V. Solovyeva, A. Shkurenko, O. El Tall, G. Maurin, M. Eddaoudi, Metal-organic frameworks to satisfy gas upgrading demands: fine-tuning the soc-MOF platform for the operative removal of H<sub>2</sub>S, *J. Mater. Chem. A*, 2017, **5**, 3293.
31. W. Li, Y. Zhang, C. Zhang, Q. Meng, Z. Xu, P. Su, Q. Li, C. Shen, Z. Fan, L. Qin, G. Zhang, Transformation of metal-organic frameworks for molecular sieving membranes, *Nat. Commun.*, 2016, **7**, 11315.
32. Y. Sun, Y. Liu, J. Caro, X. Guo, C. Song, Y. Liu, In-Plane Epitaxial Growth of Highly c-Oriented NH<sub>2</sub>-MIL-125(Ti) Membranes with Superior H<sub>2</sub>/CO<sub>2</sub> Selectivity, *Angew. Chemie Int. Ed.*, 2018, **57**, 16088.
33. Z. Dou, J. Cai, Y. Cui, J. Yu, T. Xia, Y. Yang, G. Qian, Preparation and Gas Separation Properties of Metal-Organic Framework Membranes, *Zeitschrift für anorganische und allgemeine Chemie*, 2015, **641**, 792-796.
34. M. C. McCarthy, V. Varela-Guerrero, G. V. Barnett, H.-K. Jeong, Synthesis of Zeolitic Imidazolate Framework Films and Membranes with Controlled Microstructures, *Langmuir*, 2010, **26**, 14636.
35. N. Wang, Y. Liu, Z. Qiao, L. Diestel, J. Zhou, A. Huang, J. Caro, Polydopamine-based synthesis of a zeolite imidazolate framework ZIF-100 membrane with high H<sub>2</sub>/CO<sub>2</sub>



- selectivity, *J. Mater. Chem. A*, 2015, **3**, 4722.
36. H. Jin, A. Wollbrink, R. Yao, Y. Li, J. Caro, W. Yang, A novel CAU-10-H MOF membrane for hydrogen separation under hydrothermal conditions, *J. Memb. Sci.*, 2016, **513**, 40.
  37. J. Fu, S. Das, G. Xing, T. Ben, V. Valtchev, S. Qiu, Fabrication of COF-MOF Composite Membranes and Their Highly Selective Separation of H<sub>2</sub>/CO<sub>2</sub>, *J. Am. Chem. Soc.*, 2016, **138**, 7673.
  38. K. Eum, C. Ma, A. Rownaghi, C. W. Jones, S. Nair, ZIF-8 Membranes via Interfacial Microfluidic Processing in Polymeric Hollow Fibers: Efficient Propylene Separation at Elevated Pressures, *ACS Appl. Mater. Interfaces*, 2016, **8**, 25337.
  39. Y. Liu, Y. Peng, N. Wang, Y. Li, J. H. Pan, W. Yang, J. Caro, Significantly Enhanced Separation using ZIF-8 Membranes by Partial Conversion of Calcined Layered Double Hydroxide Precursors, *ChemSusChem*, 2015, **8**, 3582.
  40. Y. Hu, Y. Wu, C. Devendran, J. Wei, Y. Liang, M. Matsukata, W. Shen, A. Neild, H. Huang, H. Wang, Preparation of nanoporous graphene oxide by nanocrystal-masked etching: toward a nacre-mimetic metal-organic framework molecular sieving membrane, *J. Mater. Chem. A*, 2017, **5**, 16255.
  41. P. Nian, Y. Cao, Y. Li, X. Zhang, Y. Wang, H. Liu, X. Zhang, Preparation of a pure ZIF-67 membrane by self-conversion of cobalt carbonate hydroxide nanowires for H<sub>2</sub> separation, *CrystEngComm*, 2018, **20**, 2440.
  42. W. Li, P. Su, Z. Li, Z. Xu, F. Wang, H. Ou, J. Zhang, G. Zhang, E. Zeng, Ultrathin metal-organic framework membrane production by gel-vapour deposition, *Nat. Commun.*, 2017, **8**, 406.
